# Supplementary material for: Launching genomics into the cloud: deployment of Mercury, a next generation sequence analysis pipeline
Source: Springer Nature journal article supplement (doi:10.1186/1471-2105-15-30), 2014-01-29

## Systems Infrastructure

### Valence Workflow Manager

Making Reads  
and Qualities  
(Primary  
Analysis)

Mapping  
(Secondary  
Analysis)

Merging and  
BAM Finishing

Variant  
Calling

Annotation  
and Data  
Delivery

LIMS

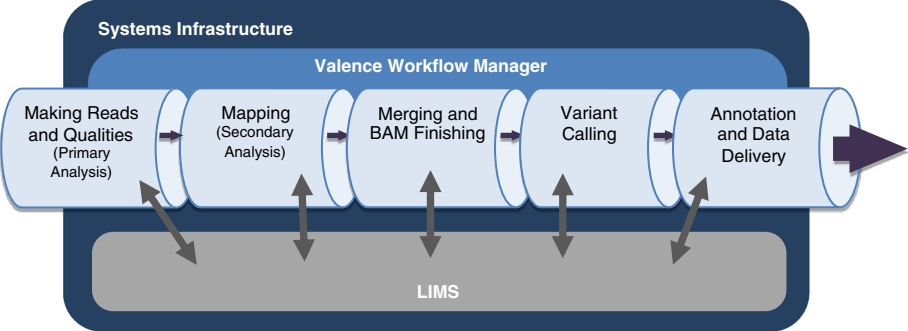

Supplement: 12859_2013_6292_MOESM1_ESM.pdf [file 12859_2013_6292_MOESM1_ESM.pdf]
